# Supplementary material for: Selecting analytical tools for characterization of polymersomes in aqueous solution
Source: Royal Society of Chemistry journal article supplement (doi:10.1039/c5ra16403f), 2015-01-01
Supplement: c5ra16403f1.pdf [file c5ra16403f1.pdf]

## Selecting analytical tools for characterization of polymersomes in aqueous solution - supplementary information

Joachim Habel, Anayo Ogbonna, Nanna Larsen, Solène Cherré, Søren Kynde, Søren Roi Midtgaard, Koji Kinoshita, Simon Krabbe, Grethe Vestergaard Jensen, Jesper Søndergaard Hansen, Kristoffer Almdal, Claus Hélix-Nielsen

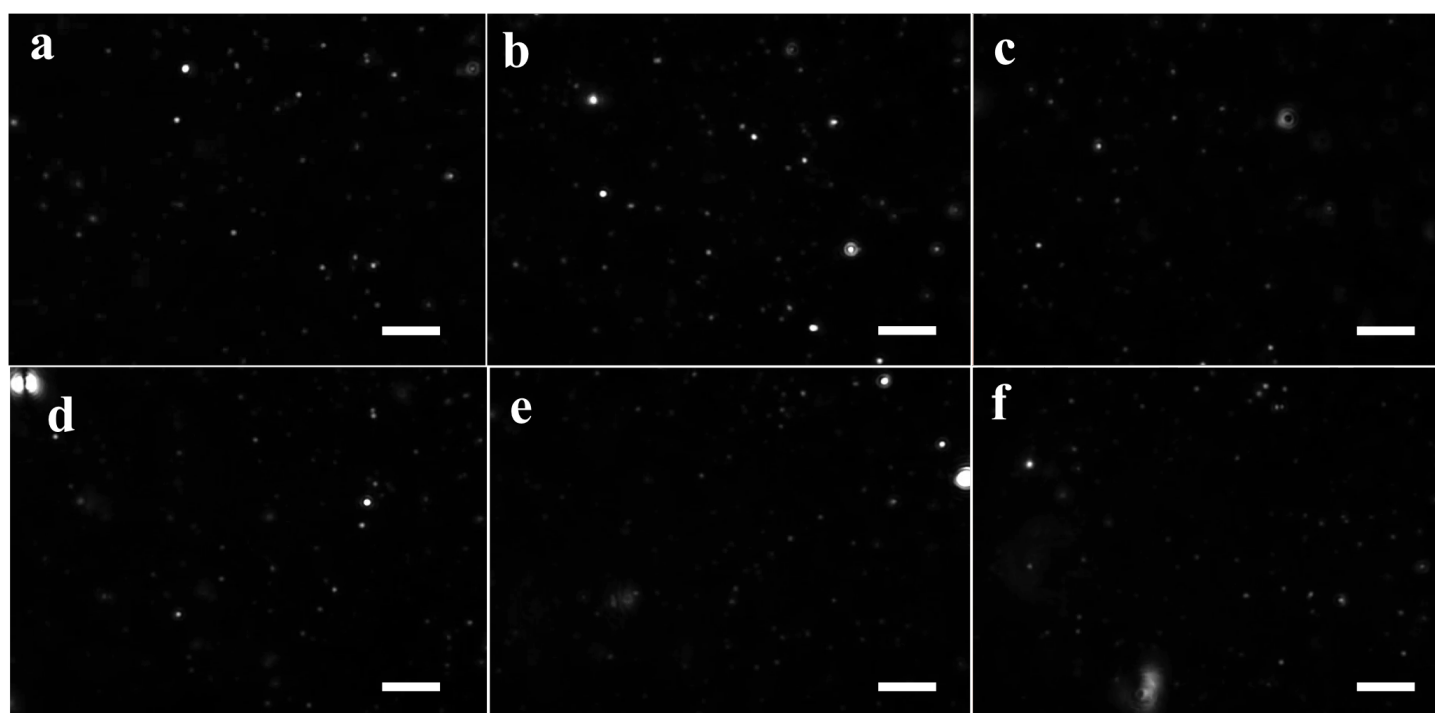

**Figure 1:** Images of light scattering projections, observed with a camera with 20X magnification sense from nanoparticle tracking analysis (NTA) analysis. a)+b) Mean population of polymersomes, c) smaller polymersome populations, d)+e) highly saturated polymersome projections due to overexposure, visible at the edges of the images, f) diffraction rings due to overexposure at the bottom of the image. Scale bar is 400 $\mu$ m.

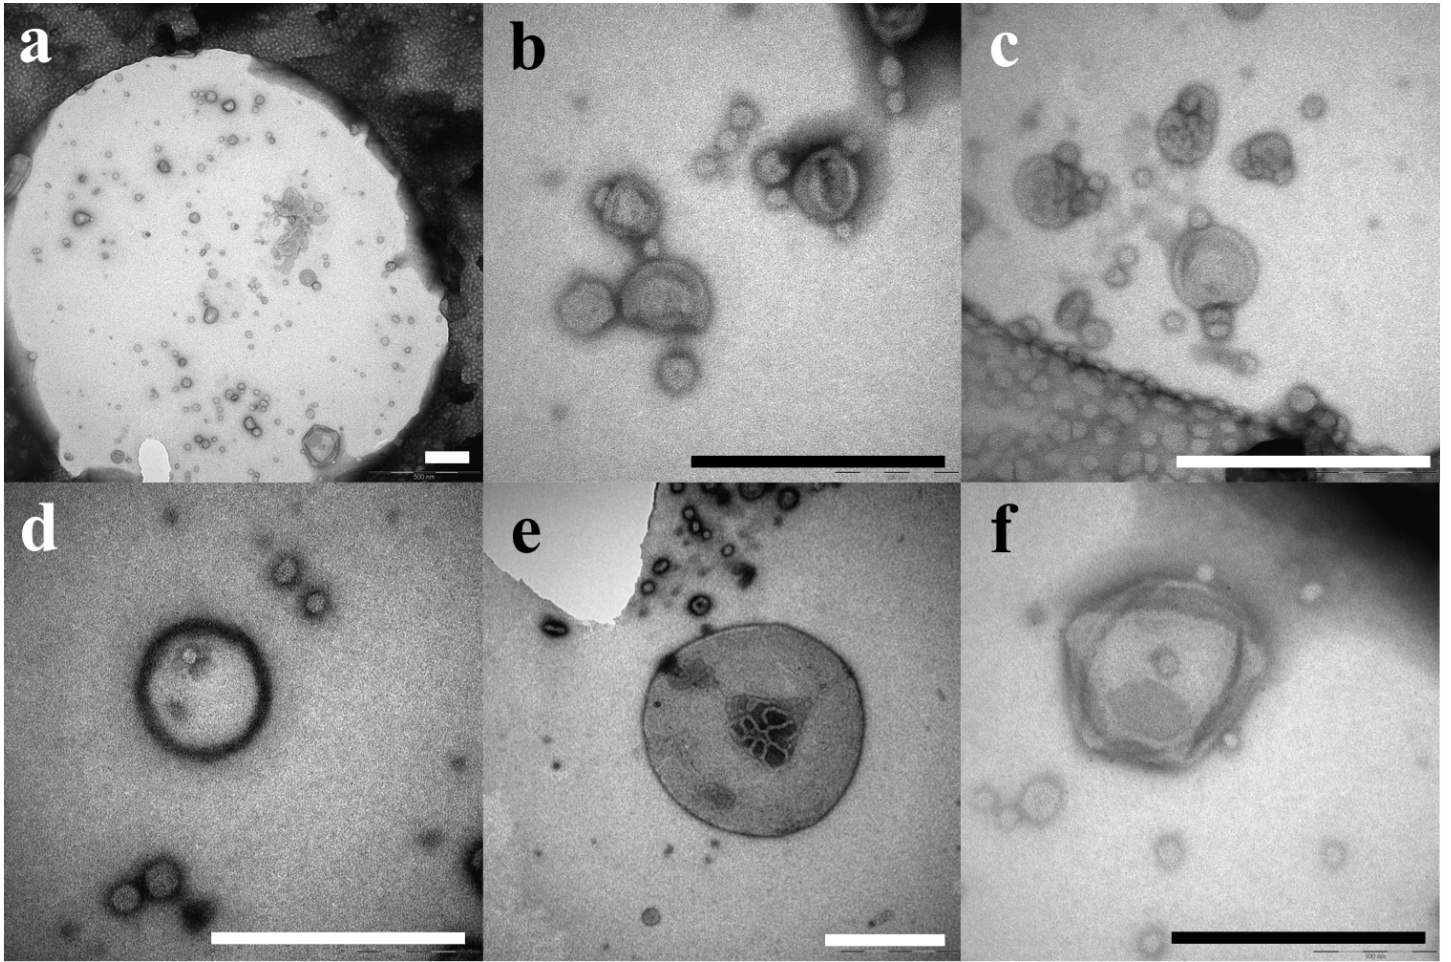

**Figure 2:** Images of negative-staining transmission electron microscopy (NS-TEM) analysis. a) Overview image containing mainly small polymerosomes, a few larger ones and ruptured bilayer sheets, potentially remains of a huge polymersome, b)-d) small and middle-sized polymerosomes, e) one of the few intact large polymersomes, f) collapsed large polymersomes. Scale bar is 200nm

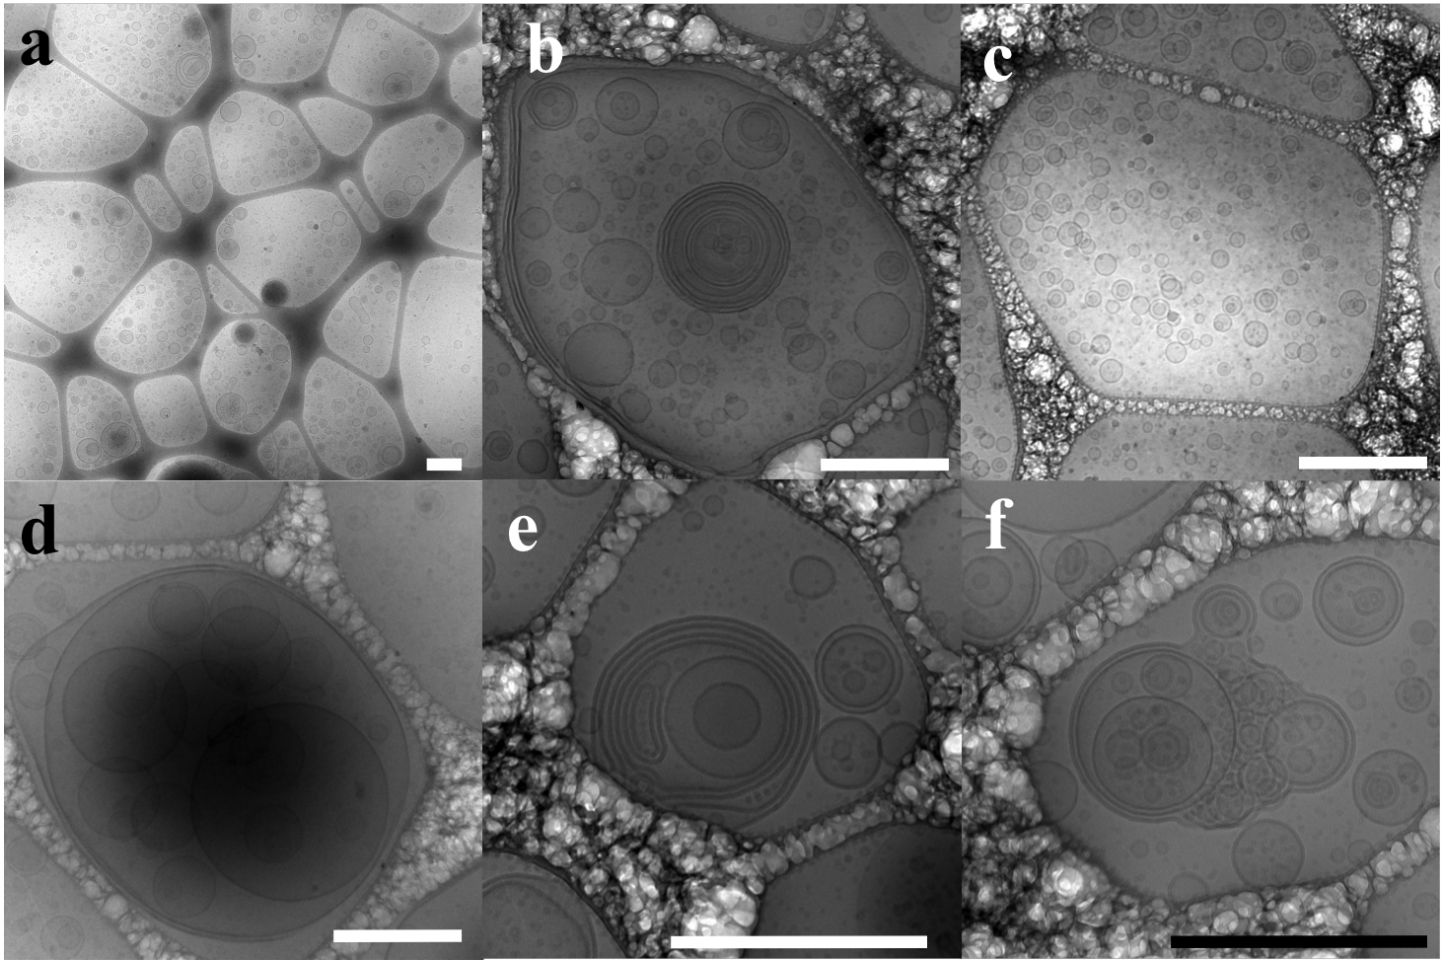

**Figure 3:** Images of Cryo-TEM analysis. a) Overview image containing all kinds of polymersome sizes and lamellarities, b) carbon hole with highly heterogeneous polymersomes, c) carbon hole with mono disperse polymersomes, d) multi vesicular polymersomes, e) multilamellar polymersomes, f) polymersome agglomeration of multi vesicular polymersomes. Scale bar is 400nm.

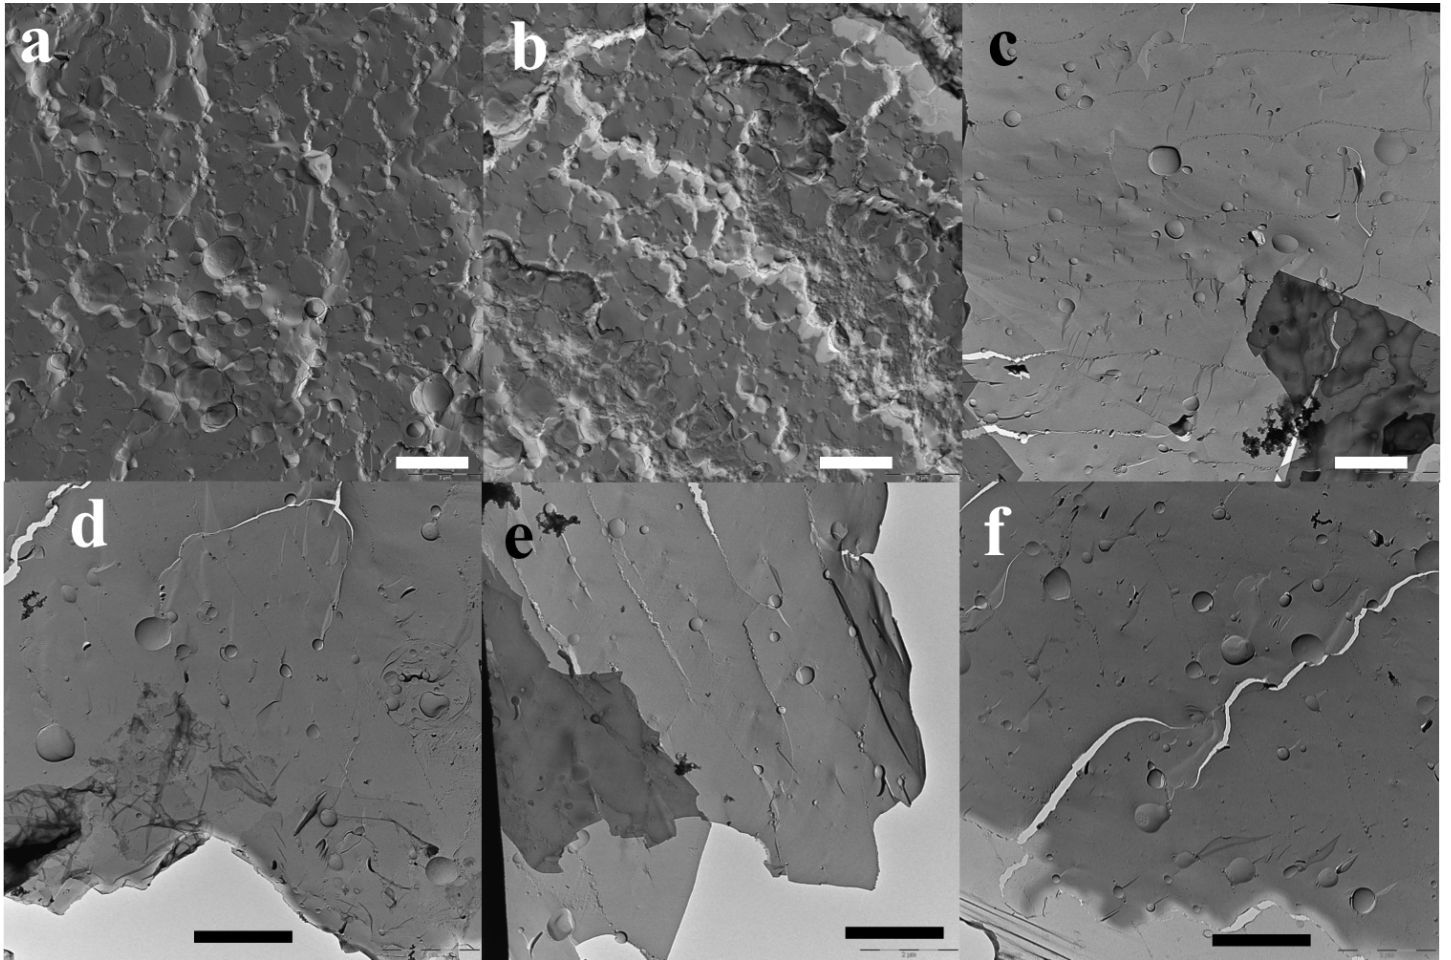

**Figure 4:** Images of Freeze fracture (FF)-TEM analysis. a)+b) Overview images containing high polymersome populations, where at b) replica cracks could be mainly observed, where there were high polymersome accumulations. c)-f) Small polymersome populations, where d)+e) were on the edges of the replica. Scale bar is  $2\mu\text{m}$ .



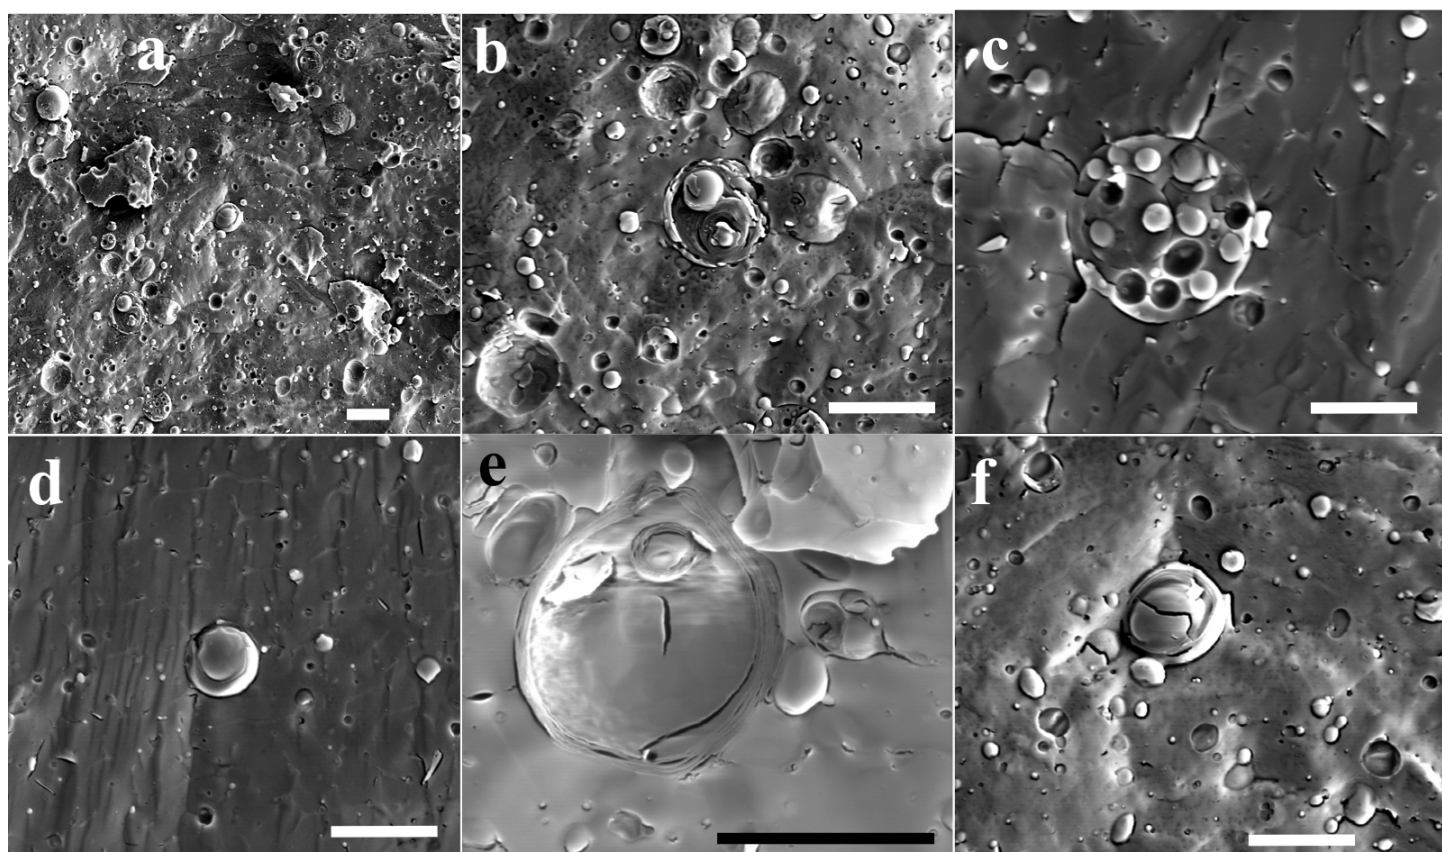

**Figure 5:** Images of FF-Cryo-scanning electron microscopy (SEM) analysis. a)+b) Overview images containing high polydisperse polymersome populations. b)+c) Multivesicular polymersomes d)+e) multilamellar polymersomes, f) melting of the sample at higher magnification. Scale bar is  $3\mu\text{m}$ .

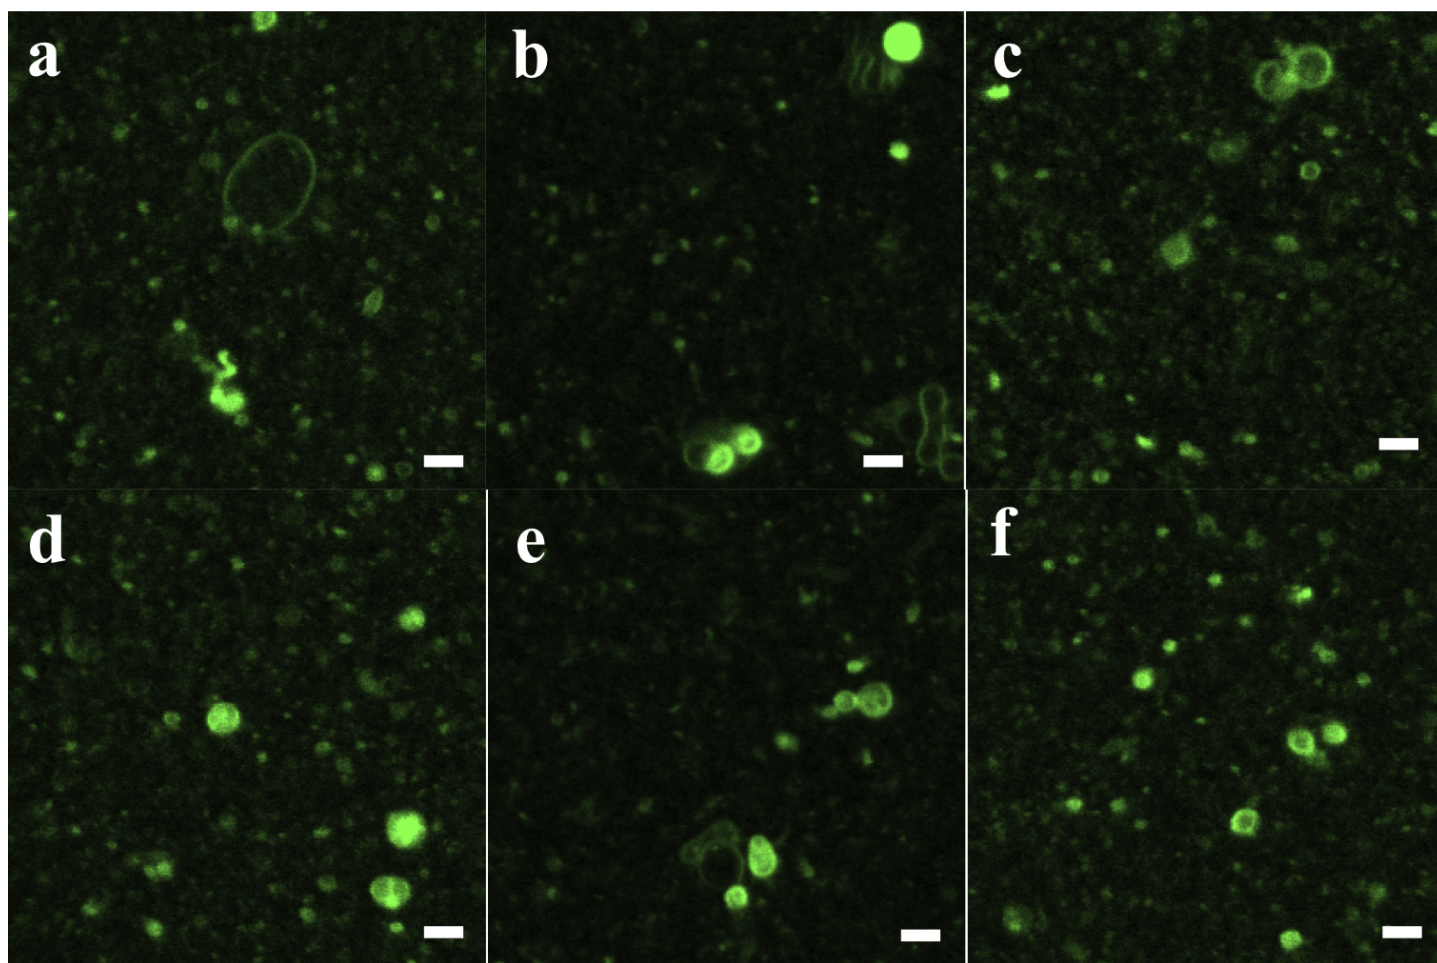

**Figure 6:** Images of confocal laser scanning microscopy (CLSM) analysis with coumarin 6 labelled polymersomes. a)+b) Mainly small coumarin-filled polymersomes, where there were some large ones, where the bilayer could be observed, b) tubular structures at the right bottom of the image, Overview images containing high polydisperse polymersome populations. c) unfilled and d) filled larger polymersomes, e) a mixture of both, f) high polymersome population. Scale bar is  $2\mu\text{m}$ .



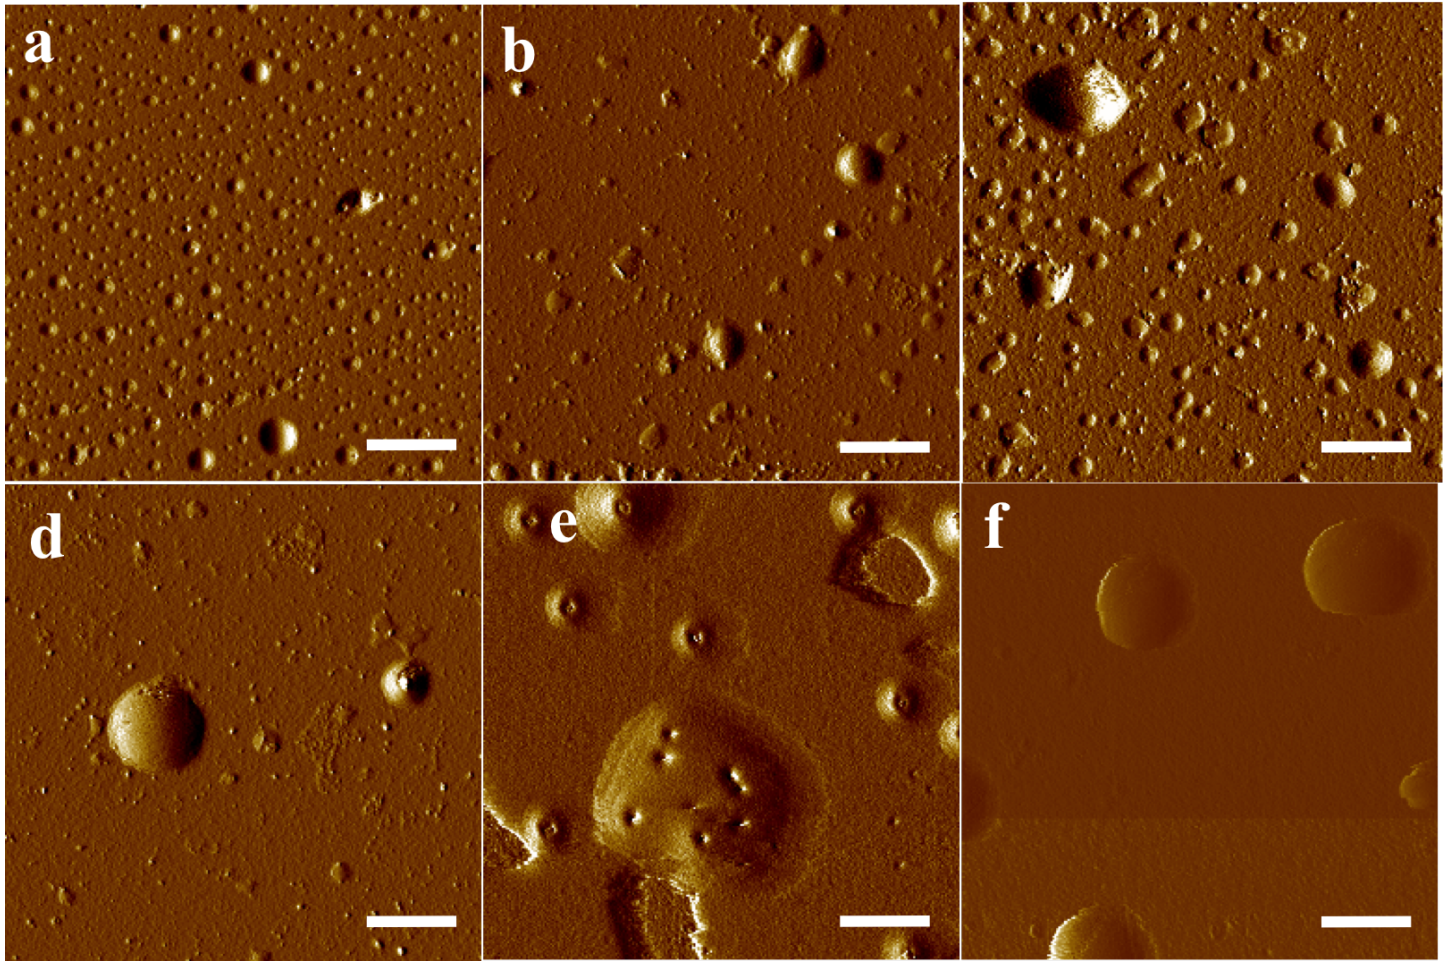

**Figure 7:** Feedback signal images of atomic force microscopy (AFM) analysis. a) Highly populated and b) rarely populated areas, c) area with polymerosomes of heterogeneous size, d) potential visualization of multilamellar polymerosomes at the right side of the image, e) artifacts due to the cantilever on top of the polymerosomes, f) large polymerosomes. Scale bar is  $1\mu\text{m}$ .

# 1 Modelling of small-angle scattering

The scattering intensity of the three shell model can be written as a sum of four concentric spheres [1]:

$$I_{3\text{shell}}(q) = \frac{n}{N_P} \left[ \sum_{i=1}^4 \rho_i V_i \Psi(q, R_i) \right]^2. \quad (1)$$

where  $R_i$  is the radius of the  $i$ 'th sphere and  $V_i = 4\pi/3 R_i^3$  is its volume,  $q$  the x-ray and neutron scattering vector and

$$\Psi(q, R) = 3 \frac{\sin(qR) - qR \cos(qR)}{(qR)^3} \quad (2)$$

is the form factor amplitude of a sphere. The factors  $\rho_i$  are given by the scattering length densities of the solvent,  $\rho_s$ , the PEO-chains,  $\rho_{\text{peo}}$ , and the PB-chains  $\rho_{\text{pb}}$ :  $\rho_1 = \rho_{\text{peo}} - \rho_s$ ,  $\rho_2 = \rho_{\text{pb}} - \rho_{\text{peo}}$ ,  $\rho_3 = \rho_{\text{peo}} - \rho_{\text{pb}}$  and  $\rho_4 = \rho_s - \rho_{\text{peo}}$ . The intensity is also proportional to the number density of scattering polymersomes which is equal to the number density of the block copolymers,  $n$ , divided by the number of polymers per polymersome  $N_P$ .

The diffuseness of the polymersome interfaces were accounted for by multiplying the scattering intensity by the function  $\exp(-s^2 q^2)$ , where  $s$  describes the width of the interface. With this addition the complete model is described by:

$$I(q) = \exp(-s^2 q^2) \int G(R_1, R, \sigma) I_{3\text{shell}}(q, R, C_v, d_{\text{bilayer}}, d_P, n) dR \quad (3)$$

A number of molecular constraints have been applied to keep the model physically meaningful and reduce the number of free parameters. First, the scattering lengths of PB<sub>33</sub> and PEO<sub>18</sub> can readily be calculated from their chemical compositions and good estimates for their partial specific volumes  $v_{\text{pb}} = 3.341 \text{ nm}^3$  and  $v_{\text{peo}} = 1.098 \text{ nm}^3$  can be found in the literature [2, 3]. This constrains the scattering length densities. Second, the total volumes of the molecules should sum up to the volume of the shells:  $N_P v_{\text{pb}} = V_2$  and  $N_P (v_{\text{peo}} + N_w v_w) = V_1 + V_3$ . A number  $N_w$  of water molecules of volume  $v_w$  are allowed in the hydrophilic shells.

## 2 Abbreviations/Nomenclature

AFM - Atomic force microscopy

CLSM - Confocal laser scanning microscopy

FF - Freeze fracture

$I$  - Scattering intensity

$n$  - Number density of the block copolymers

$N_p$  - Number of polymers per polymersome

NTA - Nanoparticle tracking analysis

NS - Negative staining

$q$  - X-ray / neutron scattering vector

$s$  - Width of polymersome interface

$R_i$  - Radius of the  $i$ 'th sphere at small-angle scattering modelling

SEM - Scanning electron microscopy

TEM - Transmission electron microscopy

$V$  - Volume of the  $i$ 'th sphere at small-angle scattering modelling

$v$  - Partial specific volumes of hydrophobic and hydrophilic polymer units or water

$\Psi(q, R)$  - Form factor amplitude of a sphere at small-angle scattering modelling

$\rho$  - Scattering length density

## References

- [1] Jan Skov Pedersen, *Analysis of small-angle scattering data from colloids and polymer solutions: modeling and least-squares fitting*. Advances in Colloid and Interface Science, 70 (0) **1997**, pp. 171–210.
- [2] Craig Bartels, Rafil Basheer, and Malcolm Dole, *Specific volumes of styrene-butadiene block copolymers. 2. Effect of solvent sorption on density measurements*. Macromolecules, 15 (5) **1982**, pp. 1422–1424.
- [3] Jan Skov Pedersen and Cornelia Sommer, "Temperature dependence of the virial coefficients and the chi parameter in semi-dilute solutions of PEG". In: *Progress in Colloid and Polymer Science*. Springer Berlin Heidelberg, 2005, pp. 70–78.
